# Supplementary material
Source: PubMed Central journal article supplement (PMC5503192)
Supplement: NIHMS868029-supplement-2.pdf [file NIHMS868029-supplement-2.pdf]

## Supplemental Figures/Tables

**Supplemental Figure 1. Receiver operating characteristic curve (ROC) for 5-year OS prediction in colon cancer by (A) NLR only and (B) the full model with NLR, age, sex, tumor stage, grade, node examined, and node positive variables. Each point on the curve represents the threshold for (A) dichotomizing NLR, and (B) dichotomizing predicted hazardous ratio by the whole model.**

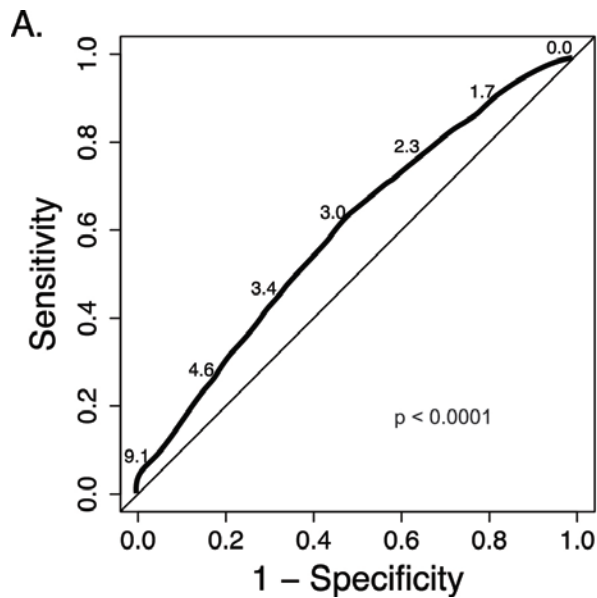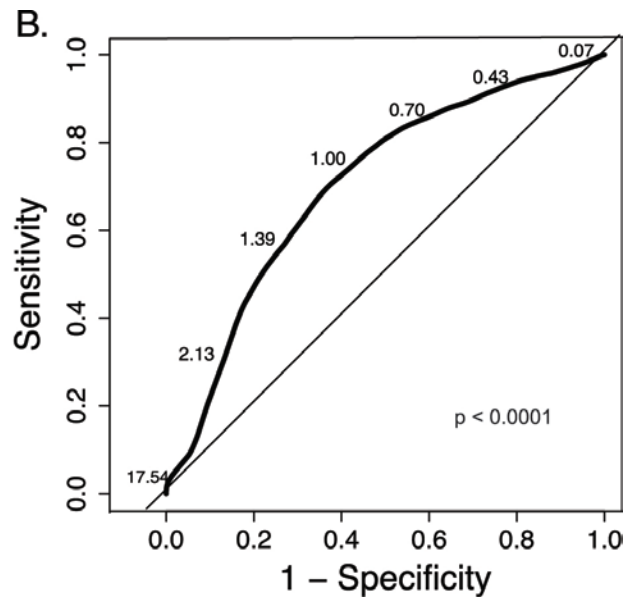

**Supplemental Figure 2. Comparison of Stage-specific and combined overall survival in patients with resectable rectal cancer, split into two groups based on NLR value at the time of diagnosis.** Kaplan-Meier curves illustrating overall survival (A) and Disease free survival (B) for disease stage I, II, III and all the stages combined. NLR is not associated with outcomes across all stages in rectal cancer.

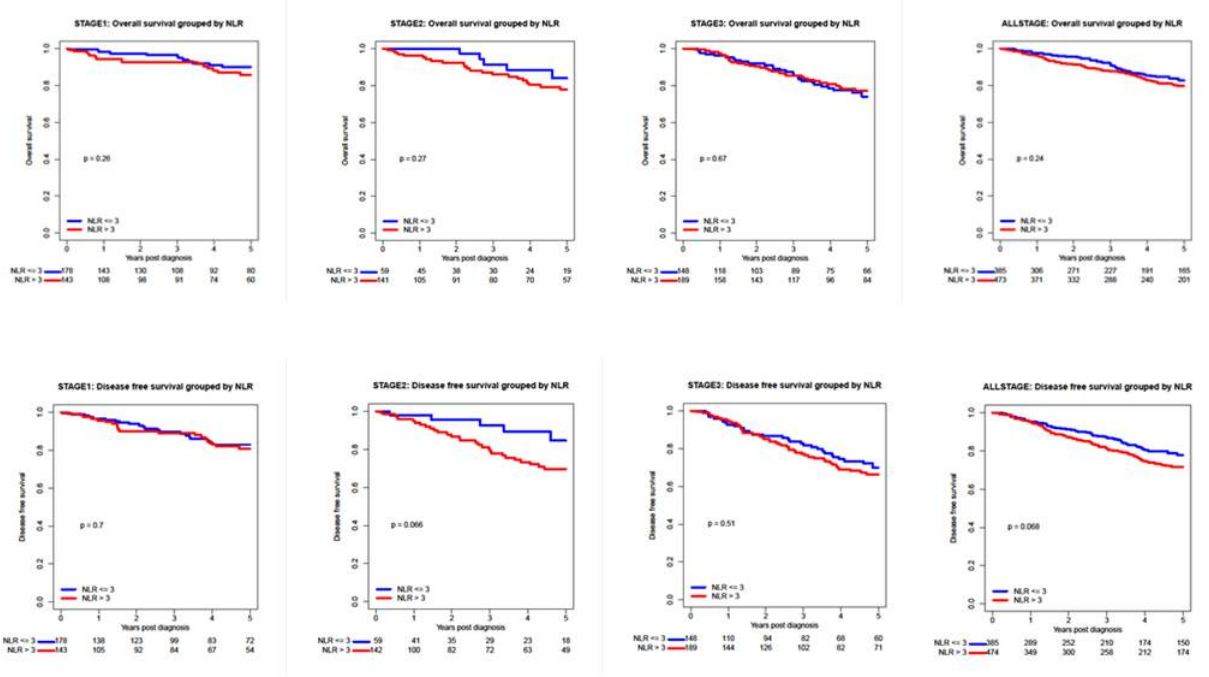

**Supplemental Figure 3. Distribution of NLR according the end point in the first two years from diagnosis.** Patients with resectable colon cancer who died within 2 years have significantly higher NLR, compared to those who did not. In case of rectal cancer the NLR value was not found to be significantly different.

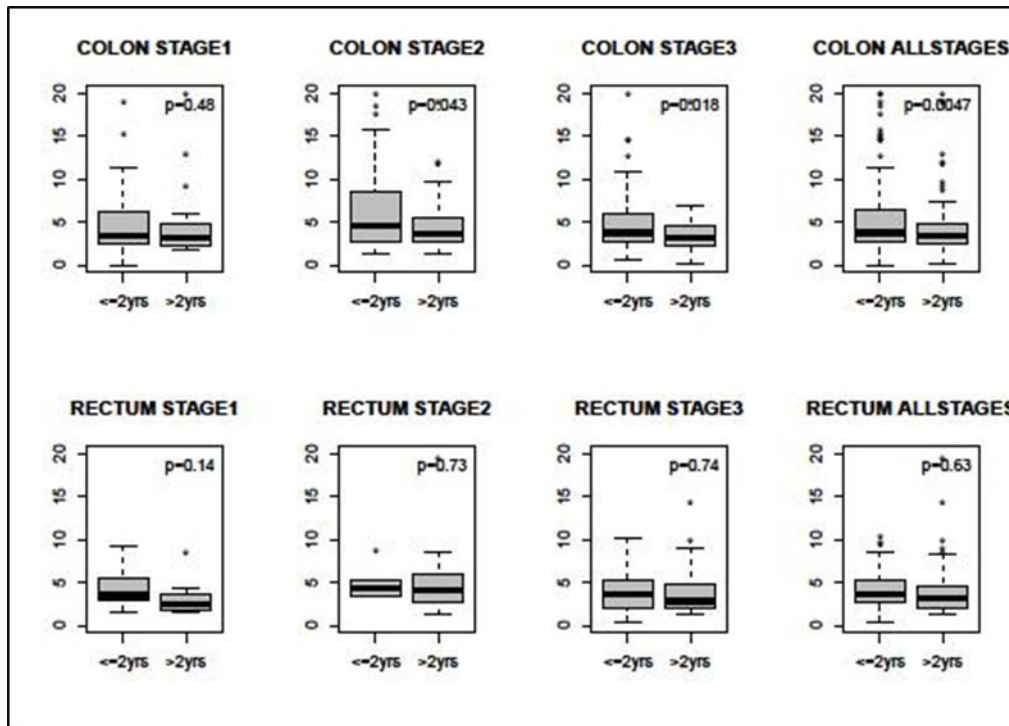



**Supplemental Table 2. C-index for predicting survival using AJCC clinical guidelines with and without addition of NLR.** The addition of NLR to the AJCC criteria significantly improves the C-index in colon cancer from 0.60 to 0.68. For rectal cancer the modest increase in C-Index was not statistically significant.

|               |            | <b>C-Index</b> | <b>SE</b> | <b>Lower</b> | <b>Upper</b> | <b>P-value</b> |
|---------------|------------|----------------|-----------|--------------|--------------|----------------|
| <b>Colon</b>  | AJCC       | 0.599          | 0.021     | 0.558        | 0.640        | <0.0001        |
|               | AJCC + NLR | 0.676          | 0.022     | 0.633        | 0.719        |                |
| <b>Rectum</b> | AJCC       | 0.607          | 0.041     | 0.527        | 0.687        | 0.85           |
|               | AJCC + NLR | 0.632          | 0.042     | 0.550        | 0.714        |                |
